# Supplementary material for: Biomimetic design of microfluidic manifolds based on a generalised Murray's law
Source: Royal Society of Chemistry journal article supplement (doi:10.1039/b516975e), 2006-01-01
Supplement: b516975e.pdf [file b516975e.pdf]

**Supplementary figure**

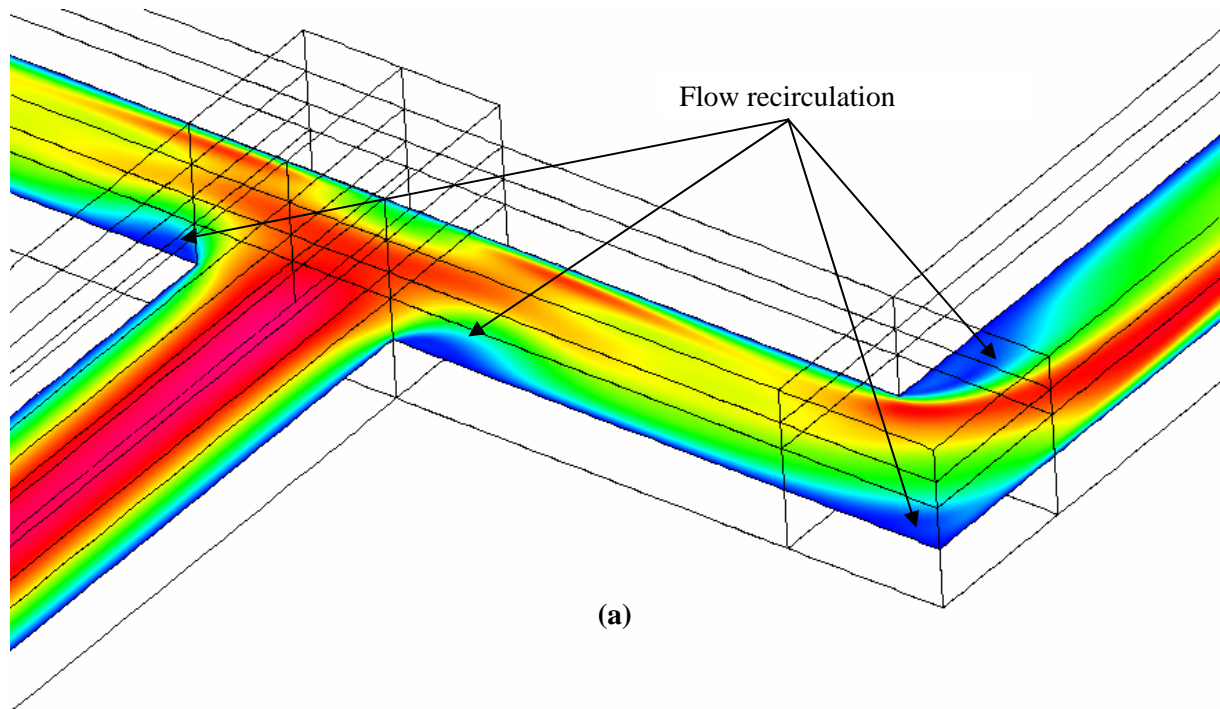

(a)

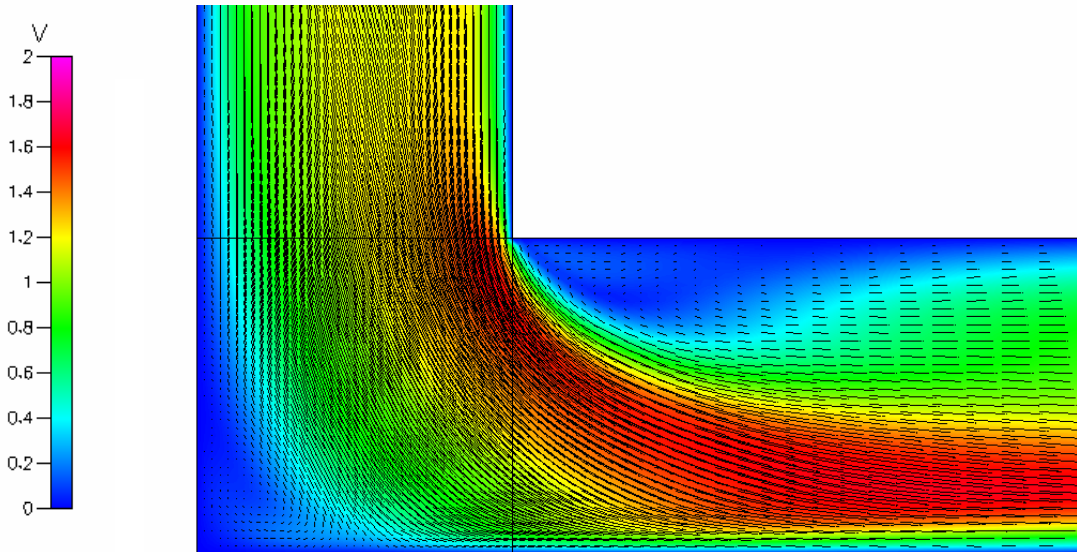

(b)

Computed velocity distribution at the first T-junction and 90° bend for an inlet Reynolds number of  $Re_0 = 250$ . (a) Normalised velocity distribution,  $V/V_0$  showing the location of the secondary eddies (b) Detail of velocity vectors around the 90° bend showing the localised flow constriction and the increased flow rate along the opposite wall.
